# Supplementary material for: Respiratory Viral Infections in Cancer Patients: Epidemiological, Clinical and Cost-Effective Study from a Developing Country
Source: Research Square preprint supplement (doi:10.21203/rs.3.rs-1266819/v1), 2022-01-19
Supplement: Supplementary file 1 [file a8b3fc273aa8030393a67994.docx]

**Supplementary Table: Cost of antibiotics**

| **Antibiotic** | **Cost of drug per vial (lowest among brands available) in INR** |
| --- | --- |
| Cefoperazone – sulbactam (3 gm) | 890 |
| Azythromycin (IV) 500mg | 190 |
| Meropenem IV (1gm) | 750 |
| Amikacin 500mg | 79 |
| Colistin 4.5million units | 4374 |
| Teicoplanin 400mg | 1830 |
